# Supplementary material
Source: MDPI journal article supplement (https://www.mdpi.com/1999-4907/13/4/601)
Supplement: s1 [file s1]

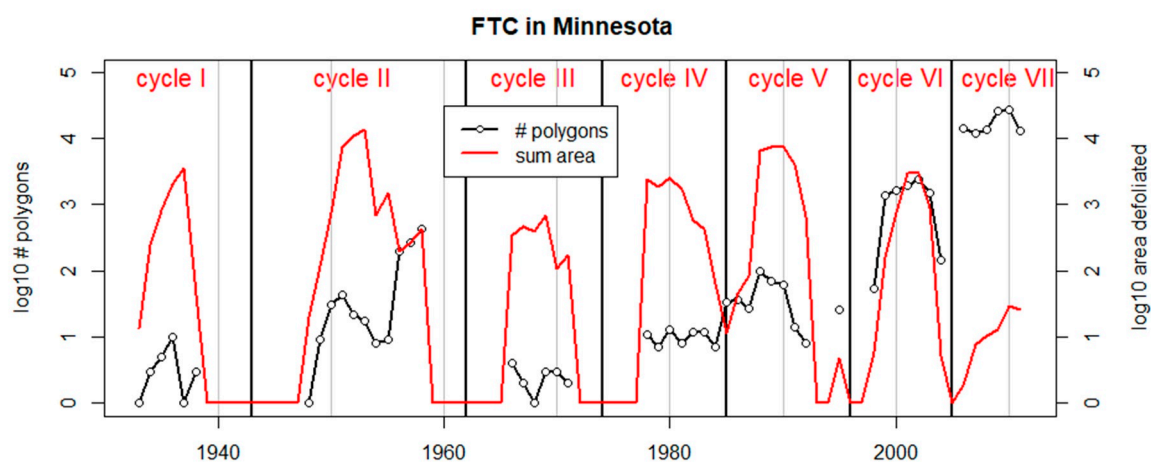

**Figure S1.** The area defoliated data of Figure 2a plotted against the number of defoliation polygons recorded. A steep rising trend in the number of polygons begins in 1995 as the areas defoliated drop. This is the result of major changes in defoliation mapping technology and practices, leading to more accurate estimates that do not carry the same positive bias as historical records prior to 1995.
